# Supplementary material for: Causal relationship between particulate matter 2.5 (PM2.5), PM2.5 absorbance, and COVID-19 risk: A two-sample Mendelian randomisation study
Source: PubMed Central journal article supplement (PMC10346132; doi:10.7189/jogh.13.06027), 2023-07-14
Supplement: jogh-13-06027-s001.pdf [file jogh-13-06027-s001.pdf]

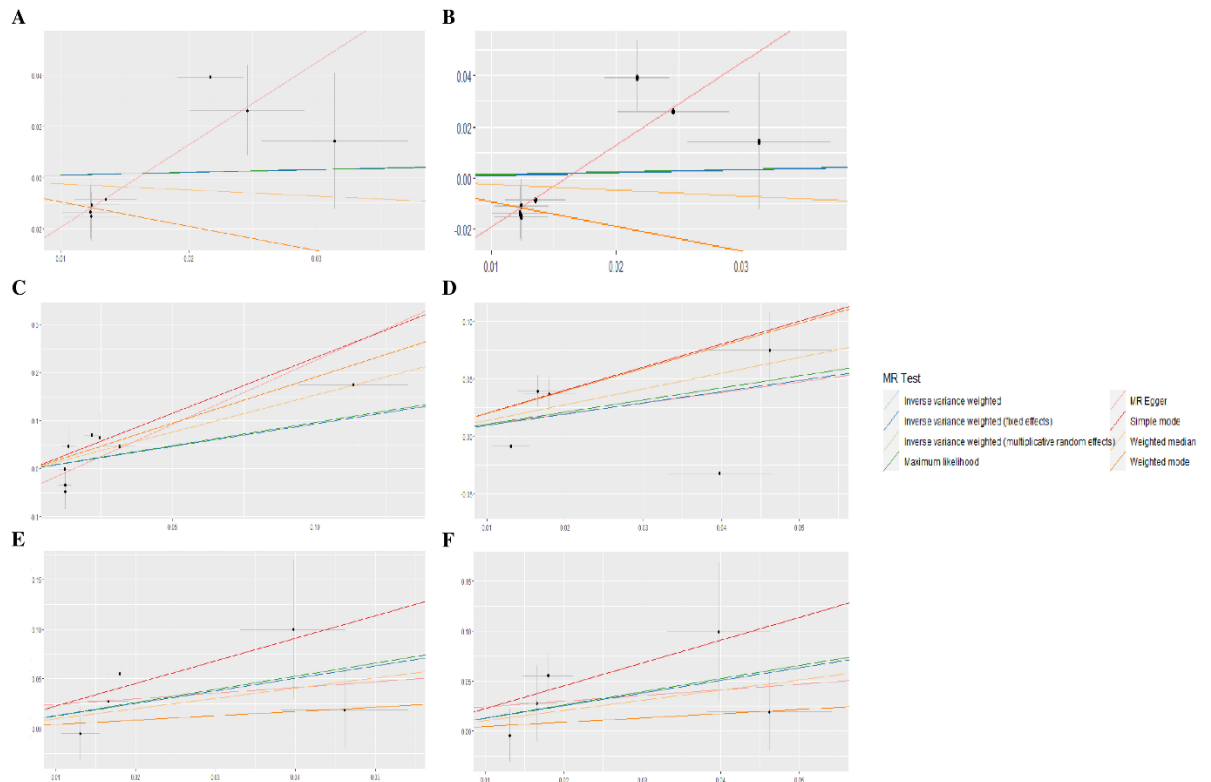

**Figure S1.** The results of Different MR analysis models on the association of PM<sub>2.5</sub> and PM<sub>2.5</sub> absorbance. **Panel A.** The association of PM<sub>2.5</sub> with COVID-19 infection; **Panel B.** The association of PM<sub>2.5</sub> with COVID-19 hospitalization; **Panel C.** The association of PM<sub>2.5</sub> with COVID-19 with VSR; **Panel D.** The association of PM<sub>2.5</sub> absorbance with COVID-19 infection, **Panel E.** The association of PM<sub>2.5</sub> absorbance with COVID-19 hospitalization, **Panel F.** The association of PM<sub>2.5</sub> absorbance with COVID-19 with VSR. VSR – very severe respiratory symptoms.

**Table S1.** The MR results of PM<sub>2.5</sub> with COVID-19

| <b>Outcome/Models</b>               | <b>OR (95%CI)</b>   | <b>P-val</b> |
|-------------------------------------|---------------------|--------------|
| <b>COVID-19 infection</b>           |                     |              |
| MR Egger                            | 24.82 (3.93-156.83) | 0.019        |
| Weighted median                     | 0.79 (0.33-1.88)    | 0.590        |
| IVW                                 | 1.11 (0.43-2.84)    | 0.831        |
| Simple mode                         | 0.39 (0.08-1.79)    | 0.269        |
| Weighted mode                       | 0.39 (0.05-3.18)    | 0.410        |
| Maximum likelihood                  | 1.12 (0.62-2.01)    | 0.715        |
| IVW (multiplicative random effects) | 1.11 (0.43-2.84)    | 0.831        |
| IVW (fixed effects)                 | 1.11 (0.63-1.96)    | 0.725        |
| MR-PRESSO                           | 0.71 (0.33-1.56)    | 0.436        |
| <b>COVID-19 hospitalization</b>     |                     |              |
| MR Egger                            | 2.72 (1.22-6.03)    | 0.037        |
| Weighted median                     | 2.06 (1.04-4.08)    | 0.038        |
| IVW                                 | 1.75 (0.96-3.19)    | 0.069        |
| Simple mode                         | 2.15 (0.34-13.50)   | 0.446        |
| Weighted mode                       | 2.22 (1.10-4.49)    | 0.038        |
| Maximum likelihood                  | 1.74 (0.96-3.17)    | 0.069        |
| IVW (multiplicative random effects) | 1.75 (0.96-3.17)    | 0.067        |
| IVW (fixed effects)                 | 1.75 (0.96-3.19)    | 0.069        |
| MR-PRESSO                           | 1.75 (0.96-3.17)    | 0.116        |

## COVID-19 with VSR

|                                     |                     |       |
|-------------------------------------|---------------------|-------|
| MR Egger                            | 14.16 (0.98-203.16) | 0.100 |
| Weighted median                     | 4.64 (0.65-32.91)   | 0.125 |
| IVW                                 | 2.56 (0.50-13.05)   | 0.259 |
| Simple mode                         | 10.12 (0.49-210.70) | 0.179 |
| Weighted mode                       | 6.69 (0.51-88.52)   | 0.192 |
| Maximum likelihood                  | 2.61 (0.57-12.06)   | 0.219 |
| IVW (multiplicative random effects) | 2.56 (0.501-13.05)  | 0.259 |
| IVW (fixed effects)                 | 2.56 (0.56-11.59)   | 0.223 |
| MR-PRESSO                           | 2.56 (0.50-13.05)   | 0.296 |

---

*P*-val – *p*-value; OR – odds ratio; CI – confidence interval; IVW – inverse variance weighted; VSR – very severe respiratory symptoms.

**Table S2.** The MR results of PM<sub>2.5</sub> absorbance with COVID-19

| <b>Outcome/Models</b>               | <b>OR (95%CI)</b>  | <b>P-val</b> |
|-------------------------------------|--------------------|--------------|
| <b>COVID-19 infection</b>           |                    |              |
| MR Egger                            | 2.52 (0.07-89.63)  | 0.647        |
| Weighted median                     | 3.93 (1.28-12.08)  | 0.017        |
| IVW                                 | 2.64 (0.72-9.74)   | 0.144        |
| Simple mode                         | 7.43 (1.51-36.57)  | 0.069        |
| Weighted mode                       | 7.10 (1.40-36.00)  | 0.077        |
| Maximum likelihood                  | 2.85 (1.37-5.95)   | 0.005        |
| IVW (multiplicative random effects) | 2.64 (0.72-9.74)   | 0.144        |
| IVW (fixed effects)                 | 2.64 (1.32-5.27)   | 0.006        |
| MR-PRESSO                           | NA                 | NA           |
| <b>COVID-19 hospitalization</b>     |                    |              |
| MR Egger                            | 1.75 (0.10-29.73)  | 0.723        |
| Weighted median                     | 2.77 (0.62-12.47)  | 0.184        |
| IVW                                 | 3.52 (1.05-11.75)  | 0.041        |
| Simple mode                         | 9.66 (0.77-102.51) | 0.153        |
| Weighted mode                       | 1.54 (0.32-7.45)   | 0.620        |
| Maximum likelihood                  | 3.73 (1.07-13.00)  | 0.039        |
| IVW (multiplicative random effects) | 3.52 (1.05-11.75)  | 0.041        |
| IVW (fixed effects)                 | 3.52 (1.09-11.36)  | 0.035        |
| MR-PRESSO                           | NA                 | NA           |

## COVID-19 with VSR

|                                     |                      |         |
|-------------------------------------|----------------------|---------|
| MR Egger                            | 8.65 (0.10-778.56)   | 0.417   |
| Weighted median                     | 48.51 (4.35-541.15)  | 0.002   |
| IVW                                 | 28.74 (4.00-206.32)  | 0.001   |
| Simple mode                         | 62.38 (2.43-1598.16) | 0.067   |
| Weighted mode                       | 60.27 (2.67-1358.76) | 0.061   |
| Maximum likelihood                  | 29.91 (3.76-237.91)  | 0.001   |
| IVW (multiplicative random effects) | 28.74 (10.83-76.30)  | < 0.001 |
| IVW (fixed effects)                 | 28.74 (4.00-206.31)  | 0.001   |
| MR-PRESSO                           | NA                   | NA      |

---

*P*-val – *p*-value; OR – odds ratio; CI – confidence interval; IVW – inverse variance weighted; VSR – very severe respiratory symptoms; NA – not applicable.

**Table S3.** Heterogeneity and pleiotropy assessment

| <b>Exposure/Outcome</b>         | <b>Cochran's Q</b> | <b>P for Cochran's Q</b> | <b>Egger intercept</b> | <b>P for intercept</b> |
|---------------------------------|--------------------|--------------------------|------------------------|------------------------|
| <b>COVID-19 infection</b>       |                    |                          |                        |                        |
| PM <sub>2.5</sub>               | 4.233              | 0.516                    | -0.051                 | 0.018                  |
| PM <sub>2.5</sub> absorbance    | 14.259             | 0.003                    | 0.001                  | 0.978                  |
| <b>COVID-19 hospitalization</b> |                    |                          |                        |                        |
| PM <sub>2.5</sub>               | 3.140              | 0.678                    | -0.023                 | 0.157                  |
| PM <sub>2.5</sub> absorbance    | 3.853              | 0.278                    | 0.019                  | 0.623                  |
| <b>COVID-19 with VSR</b>        |                    |                          |                        |                        |
| PM <sub>2.5</sub>               | 5.810              | 0.445                    | -0.040                 | 0.177                  |
| PM <sub>2.5</sub> absorbance    | 0.643              | 0.887                    | 0.029                  | 0.601                  |

*P* – *p* value; VSR – very severe respiratory symptoms.
